# Supplementary material for: Toward a high performance asymmetric hybrid capacitor by electrode optimization
Source: Royal Society of Chemistry journal article supplement (doi:10.1039/c9qi00927b), 2019-01-01
Supplement: c9qi00927b1.pdf [file c9qi00927b1.pdf]

## Supporting Information

### **Toward high performance asymmetric hybrid capacitor by electrode optimization**

Ying Liu<sup>a</sup>, Pengfei Hu<sup>a</sup>, Hengqi Liu<sup>a</sup>, Jianrong Song<sup>a</sup>, Ahmad Umar<sup>b</sup>, Xiang Wu<sup>a,\*</sup>

<sup>a</sup>School of Materials Science and Engineering, Shenyang University of Technology,  
Shenyang 110870, China

<sup>b</sup>Department of Chemistry, Najran University, Najran 11001, Kingdom of Saudi  
Arabia

E-mail: wuxiang05@sut.edu.cn (X. Wu)

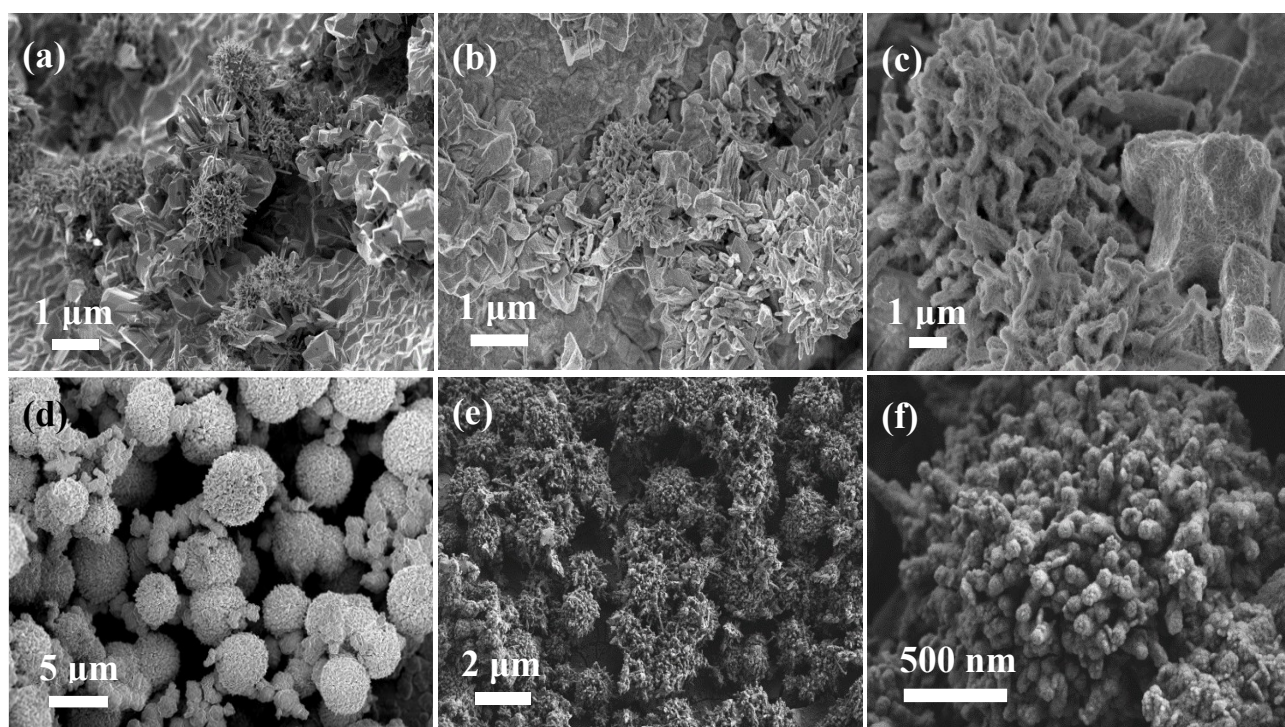

**Fig. S1** SEM images (a) MNS-0.5 (b, c) MNS-0.5@ PPy at different magnification (d) MNS-2 (e, f) MNS-2@ PPy at different magnification

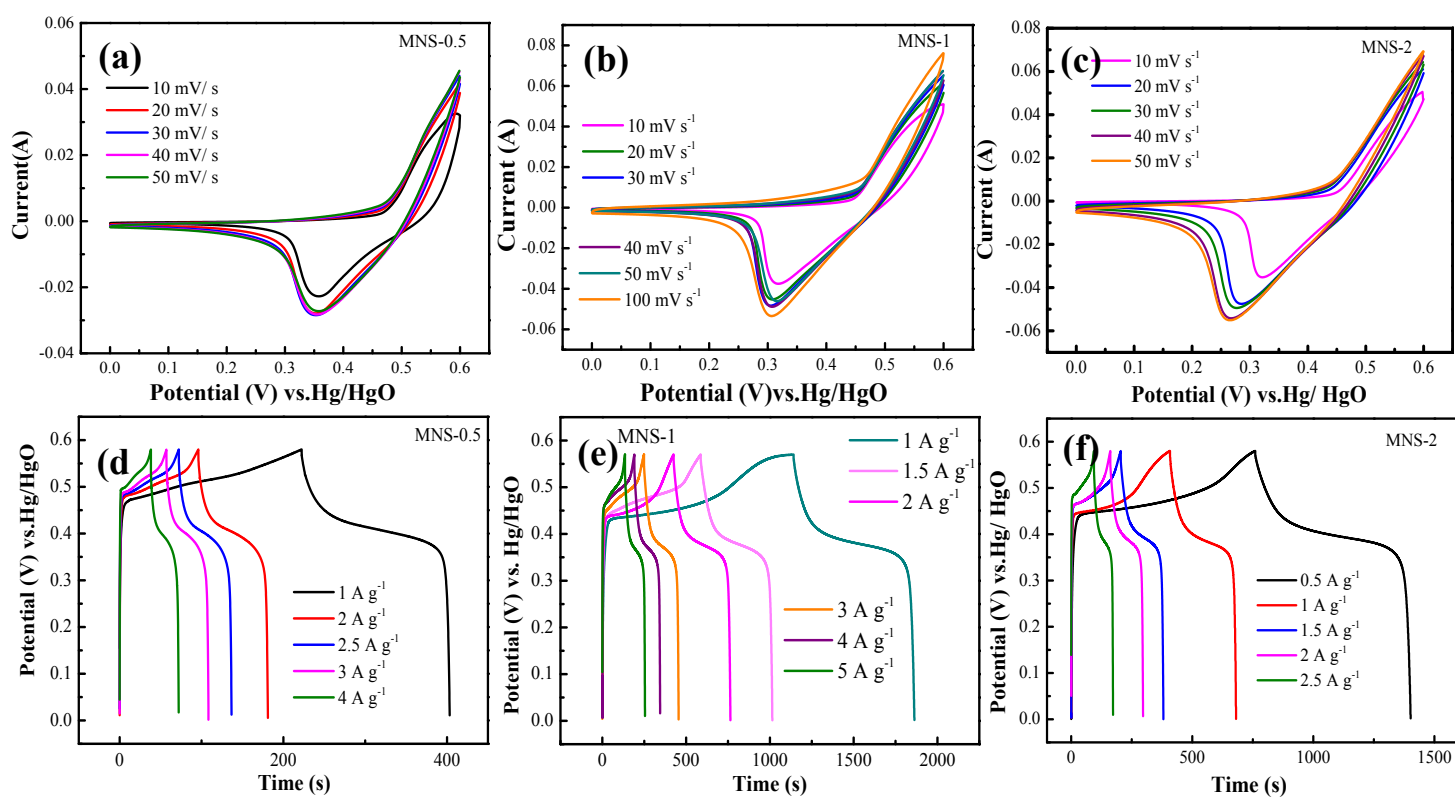

**Fig. S2** Electrochemical performances (a-c) the CV curves of MNS-0.5, MNS-1 and MNS-2 samples (d-f) the GCD curves of MNS-0.5, MNS-1 and MNS-2 samples

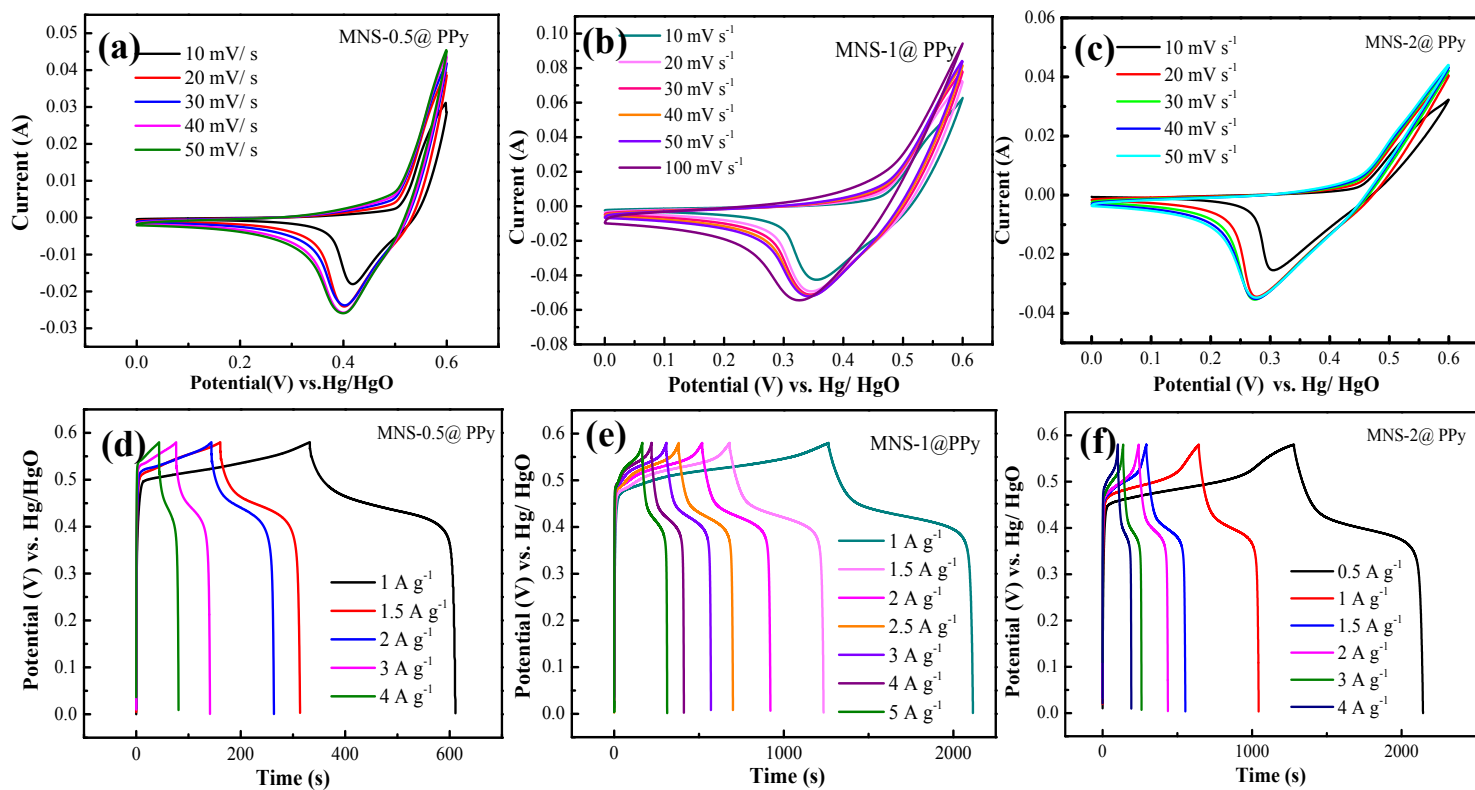

**Fig. S3** Electrochemical performances (a-c) the CV curves of MNS-X@ PPy samples

(d-f) the GCD curves of MNS-X@ PPy samples

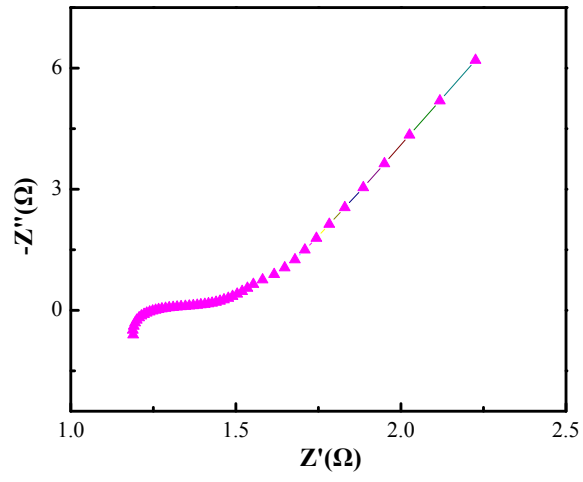

**Fig. S4** EIS curve of device
